# Supplementary material
Source: Springer Nature journal article supplement (https://www.springermedizin.de/resource/supplementary/12967_2011_1056_MOESM1_ESM.pdf/9573672)

**A**  
**Survival proportion (%)**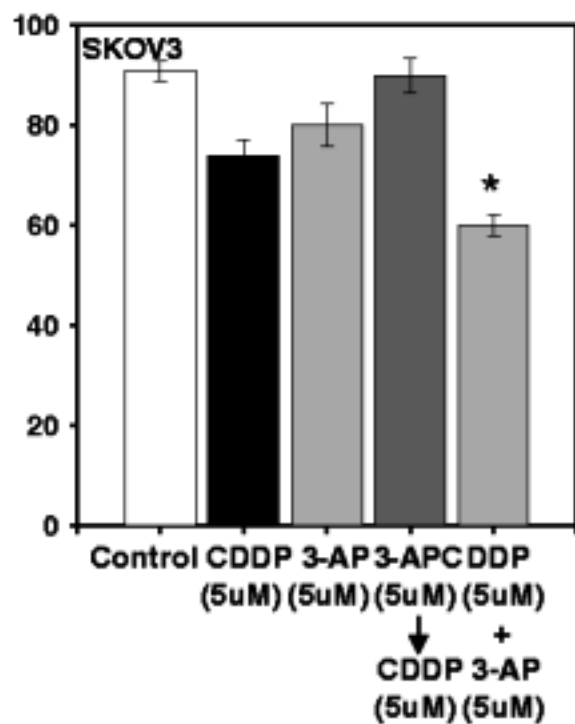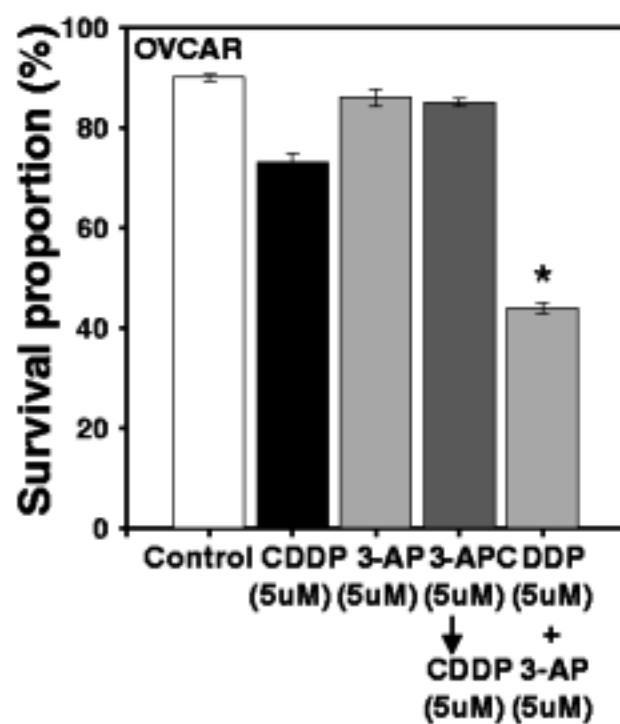**B****SKOV3 Clonogenic Survival**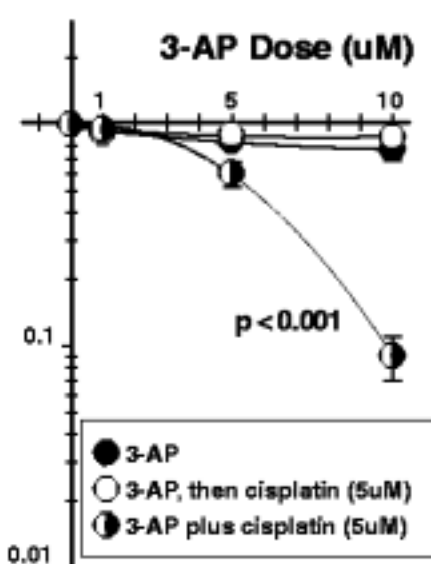**OVCAR3 Clonogenic Survival**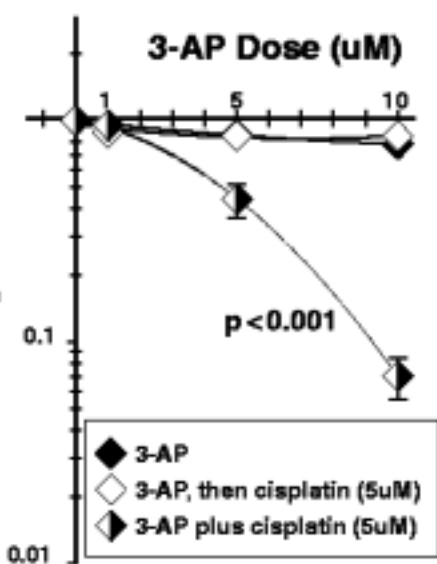**Clonogenic Survival**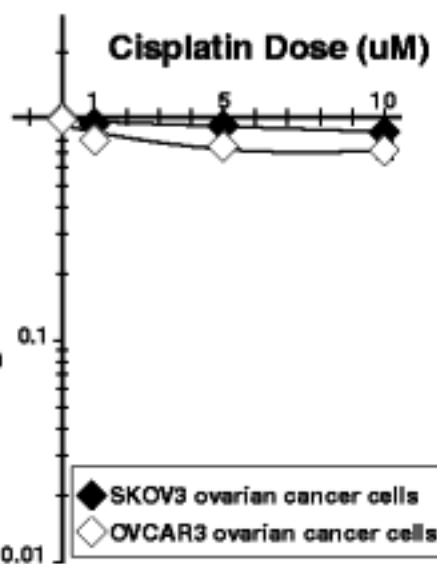

Supplement: MOESM1 [file 9573672]
